# Supplementary material
Source: PubMed Central journal article supplement (PMC6867513)

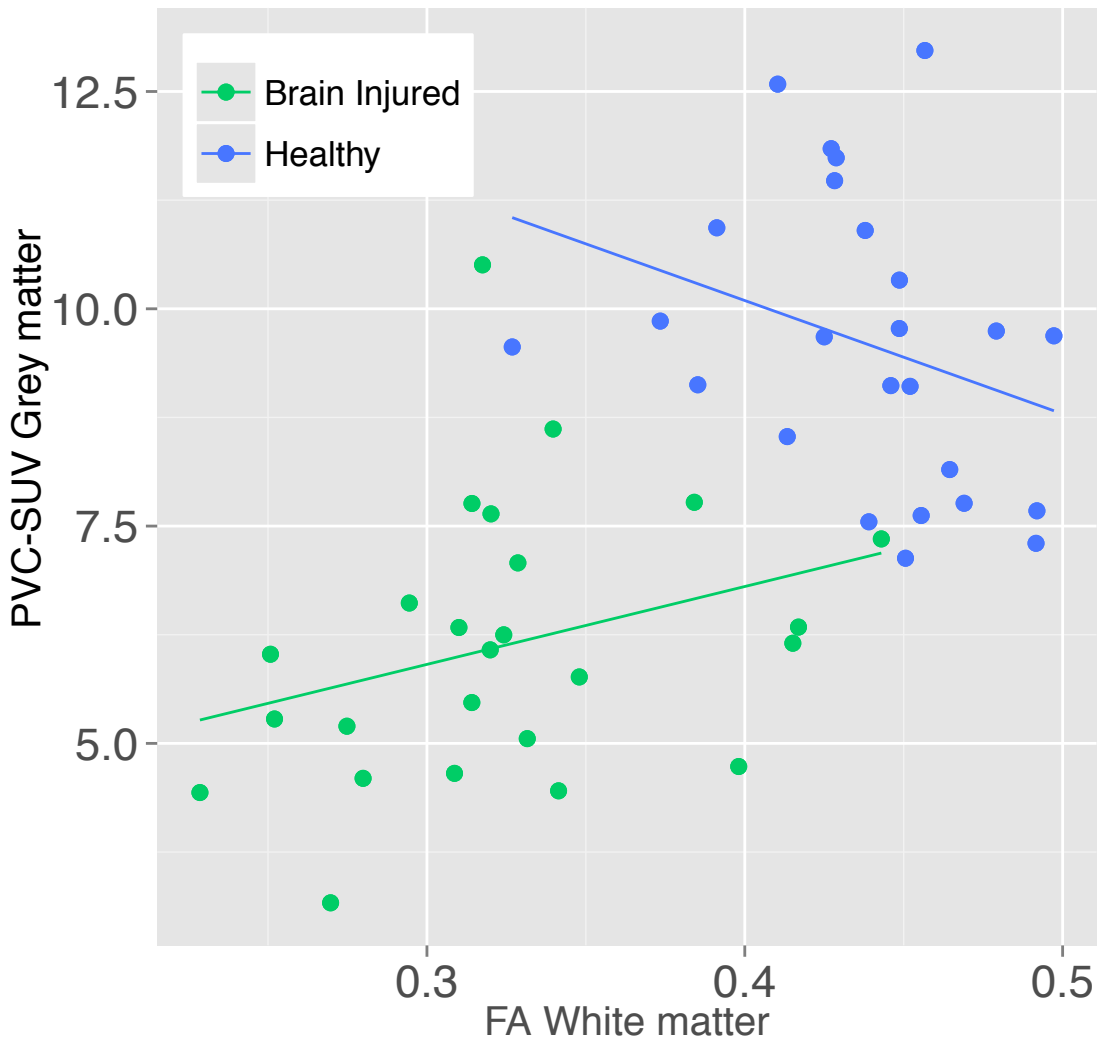

Supplement: HBM-37-3707-s001.pdf [file HBM-37-3707-s001.pdf]

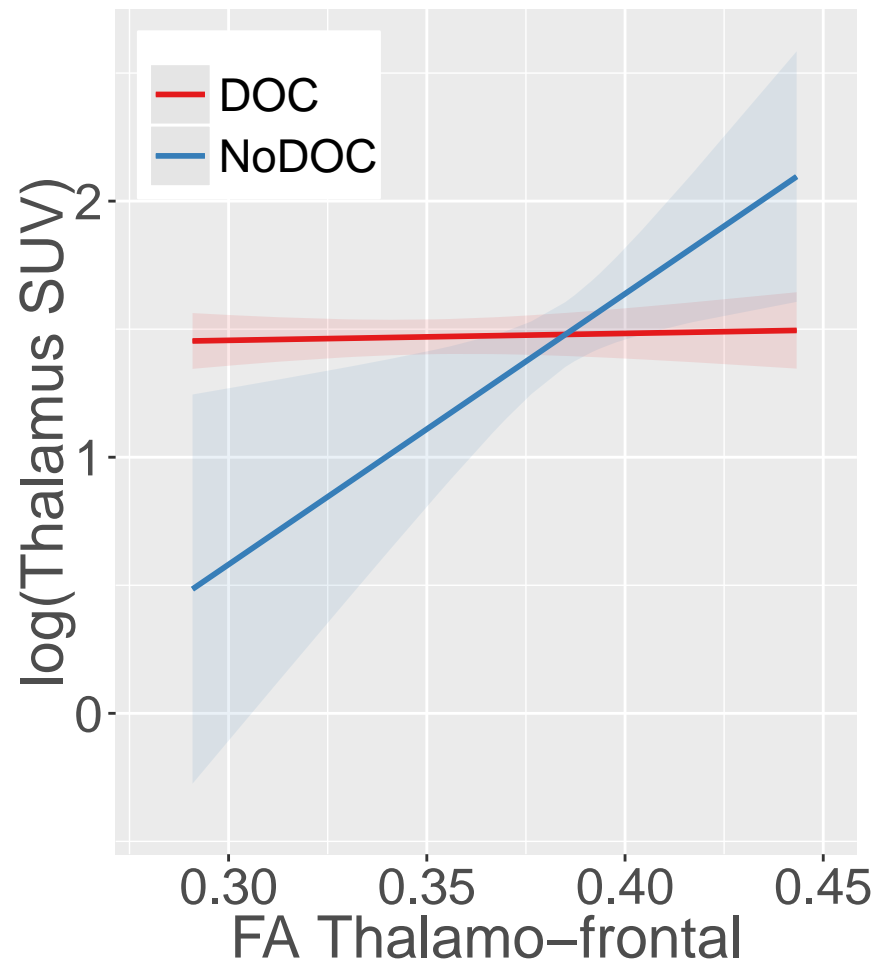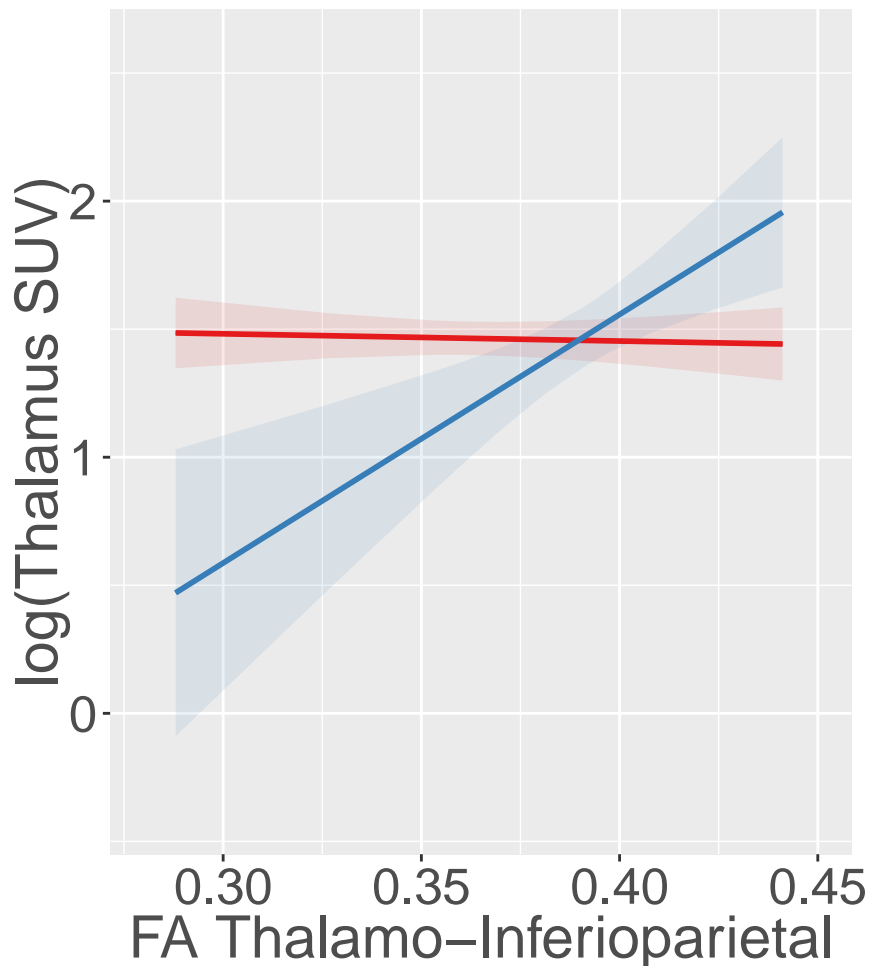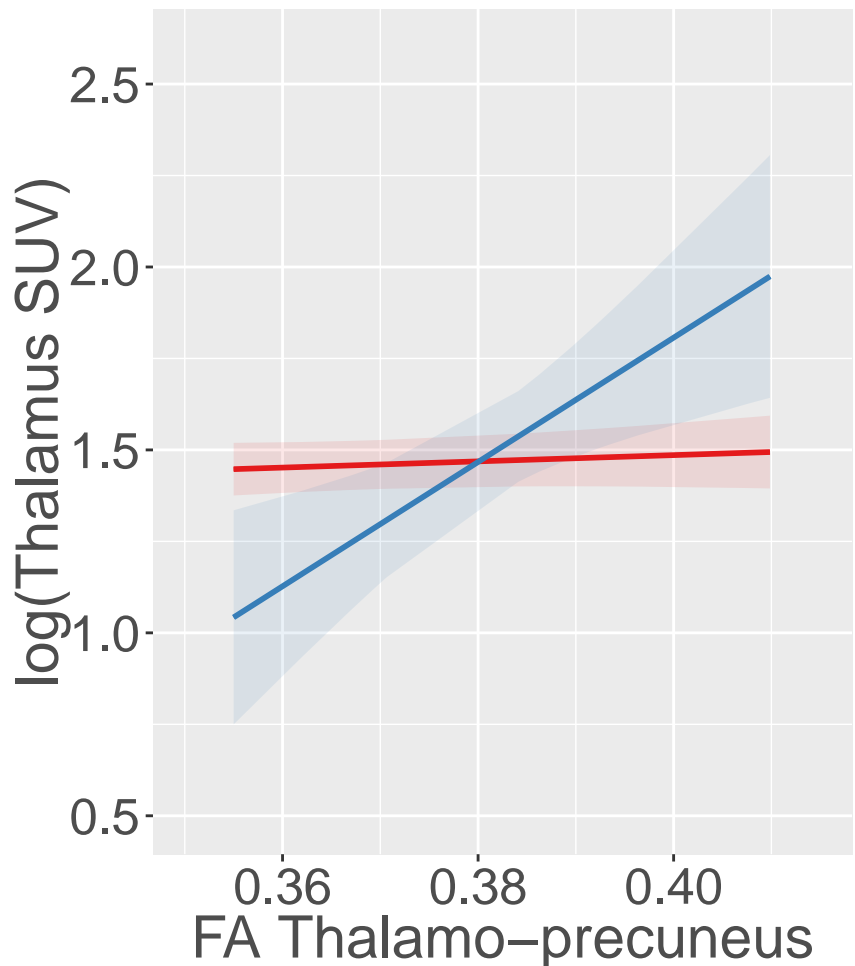

Supplement: HBM-37-3707-s002.pdf [file HBM-37-3707-s002.pdf]

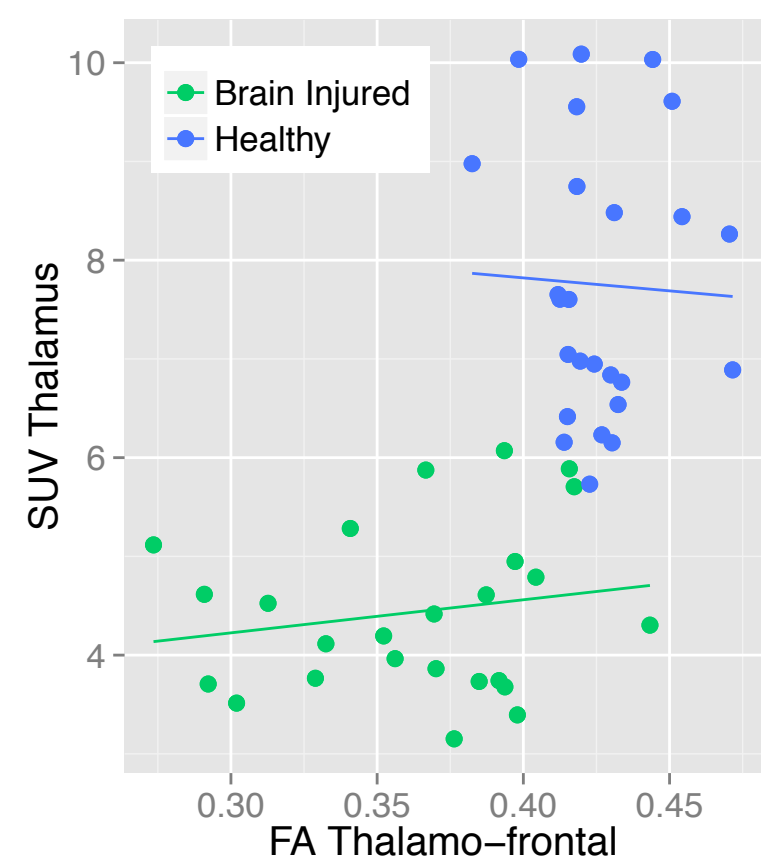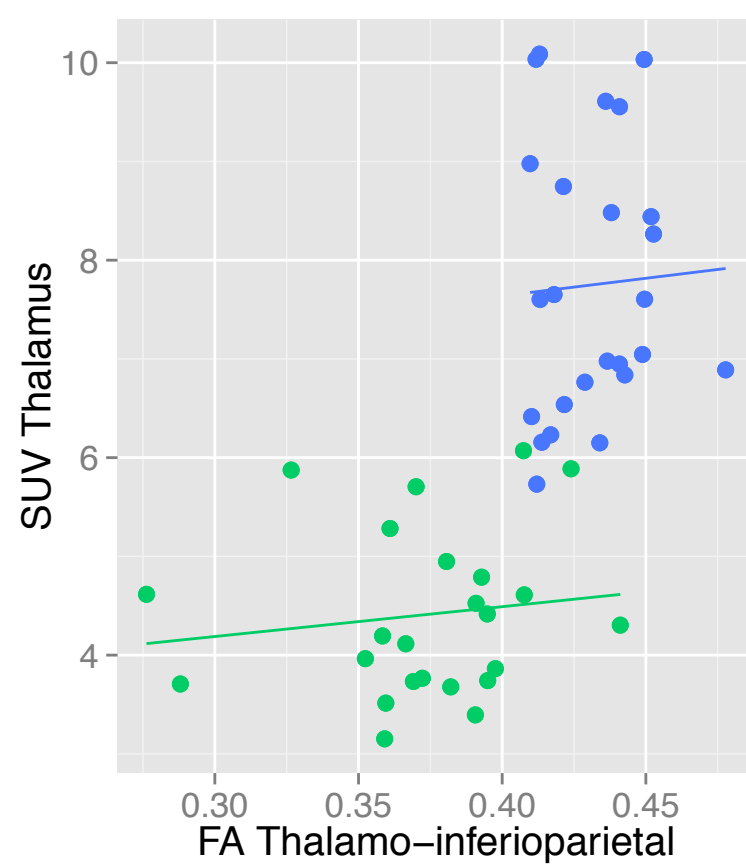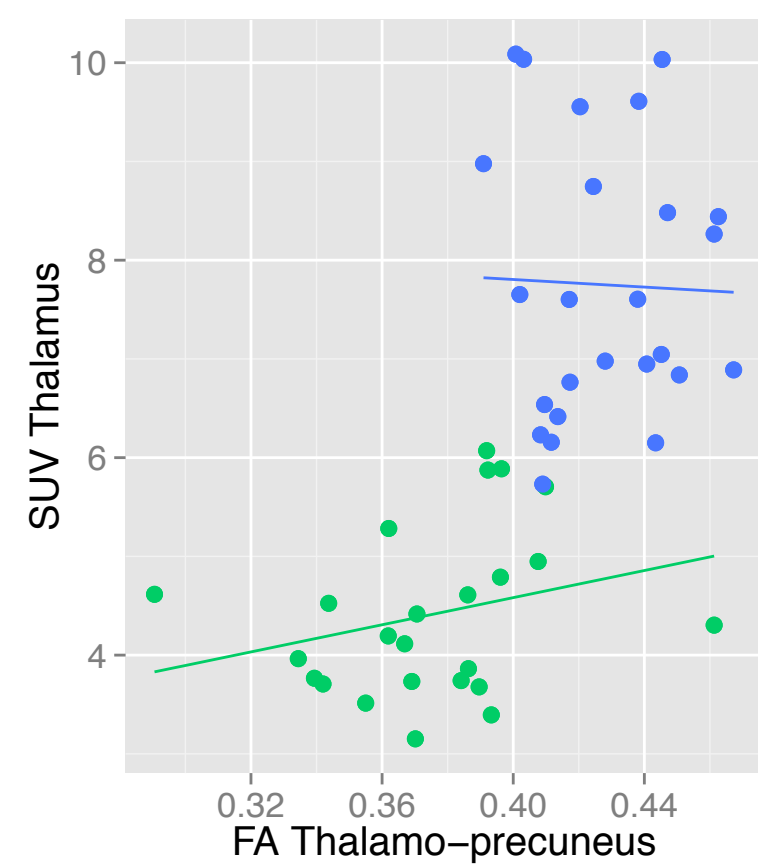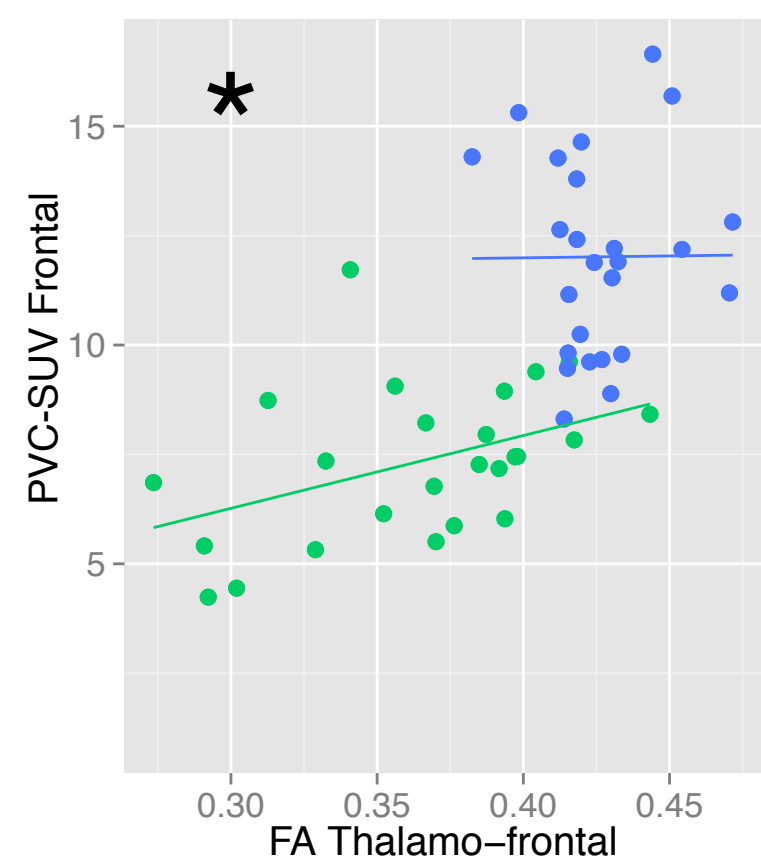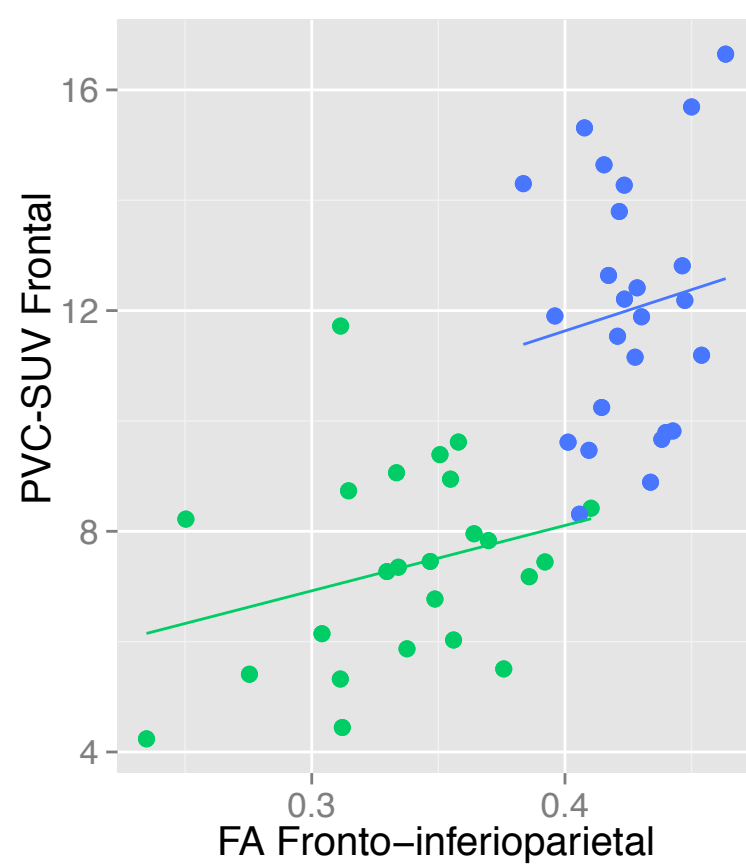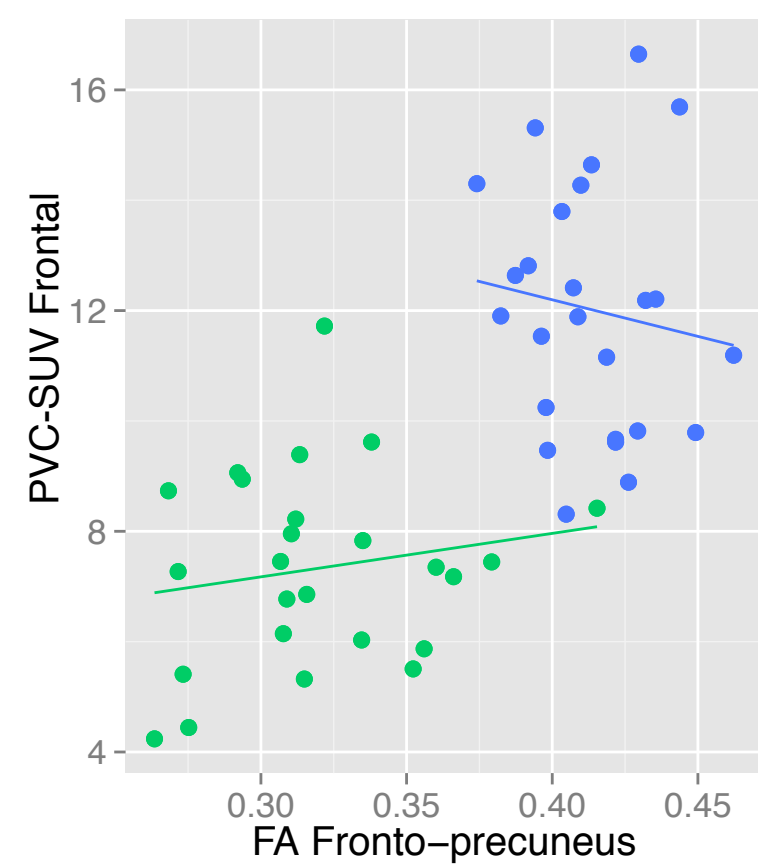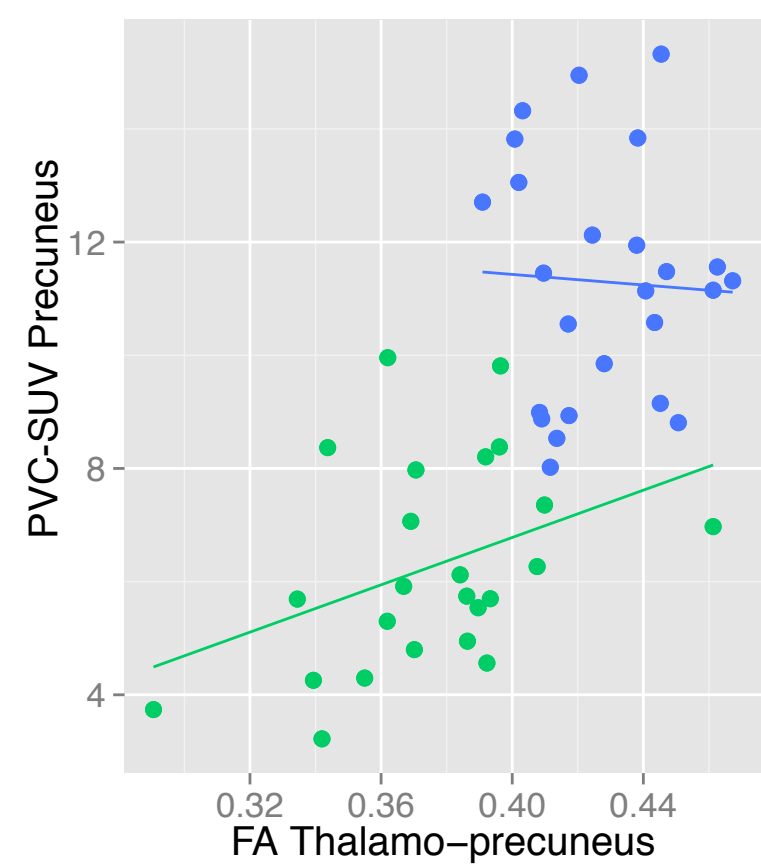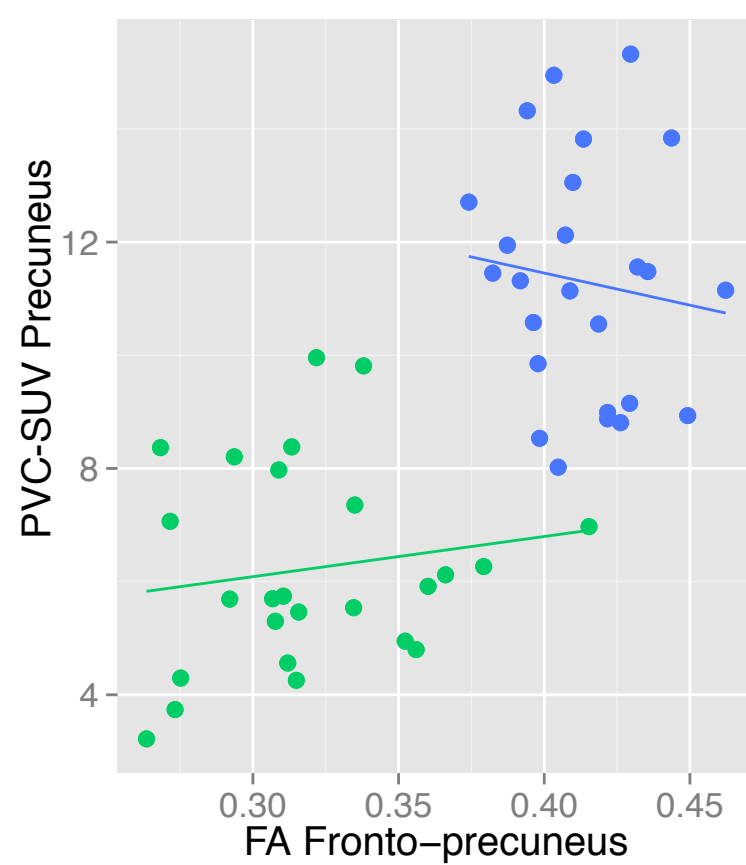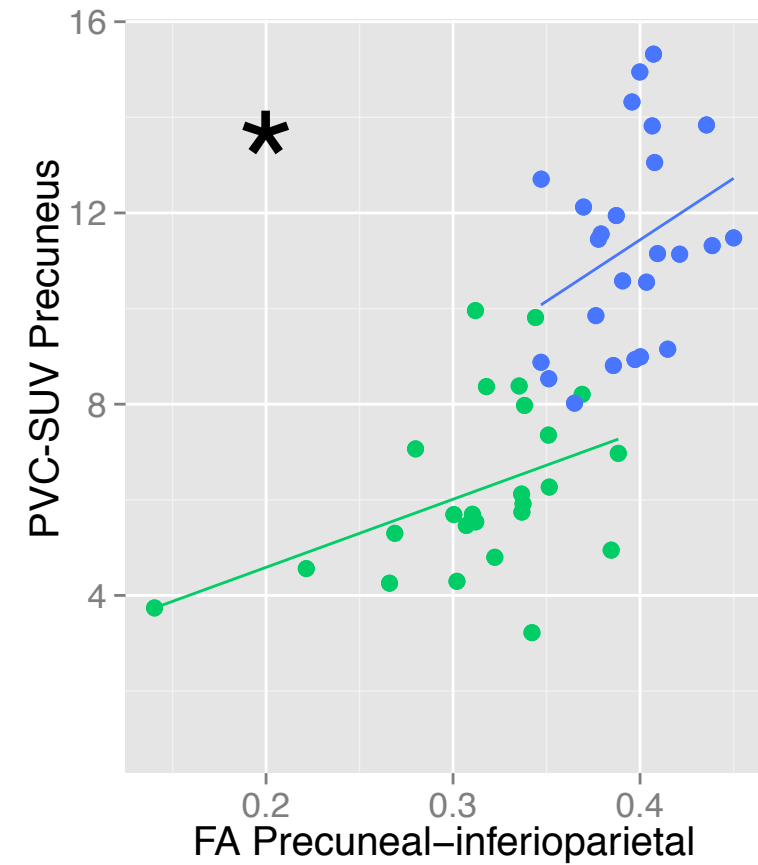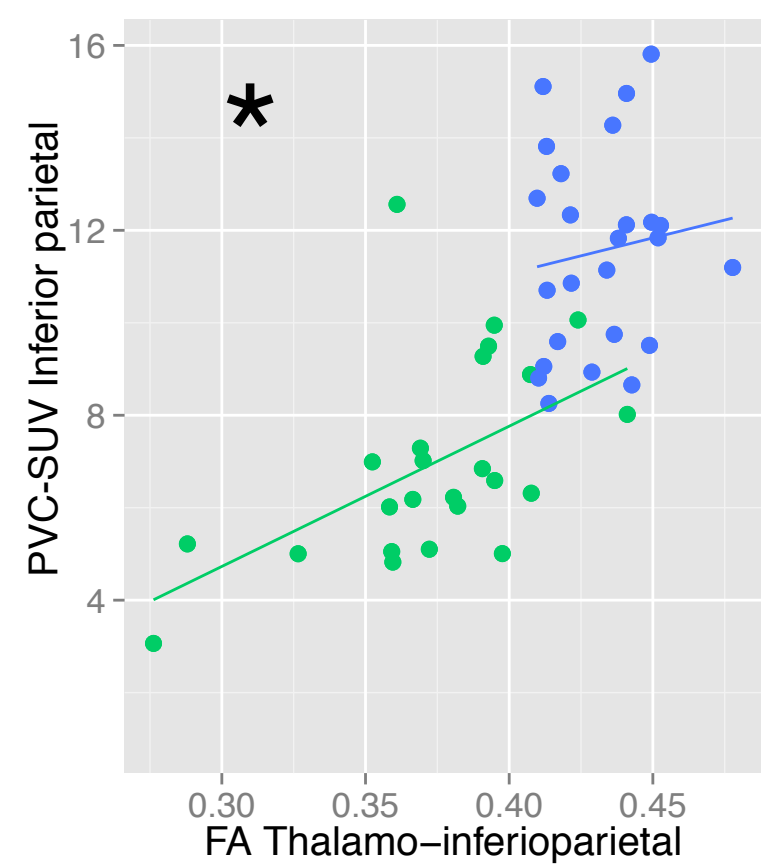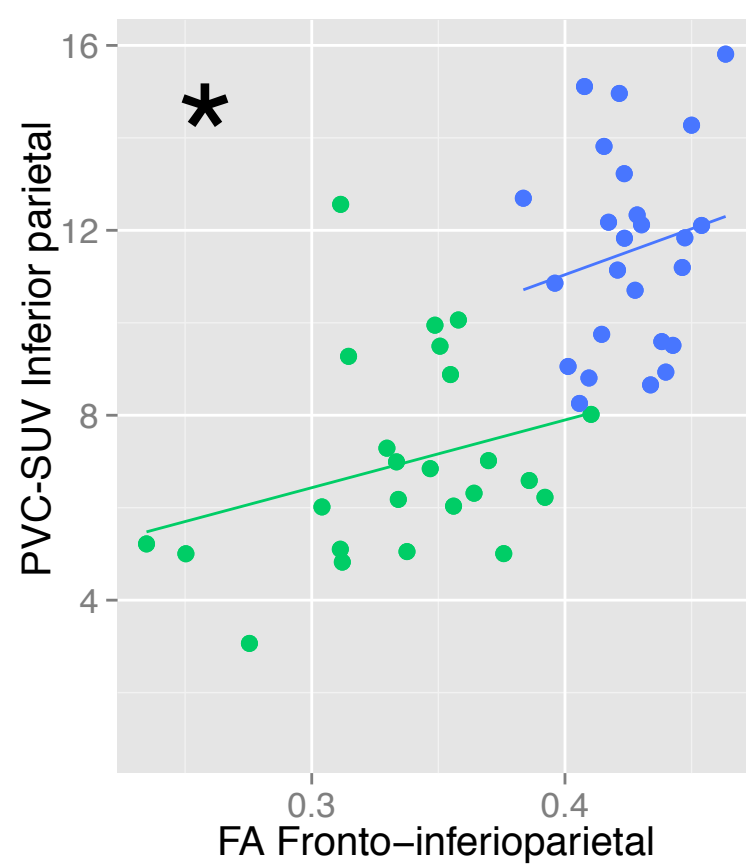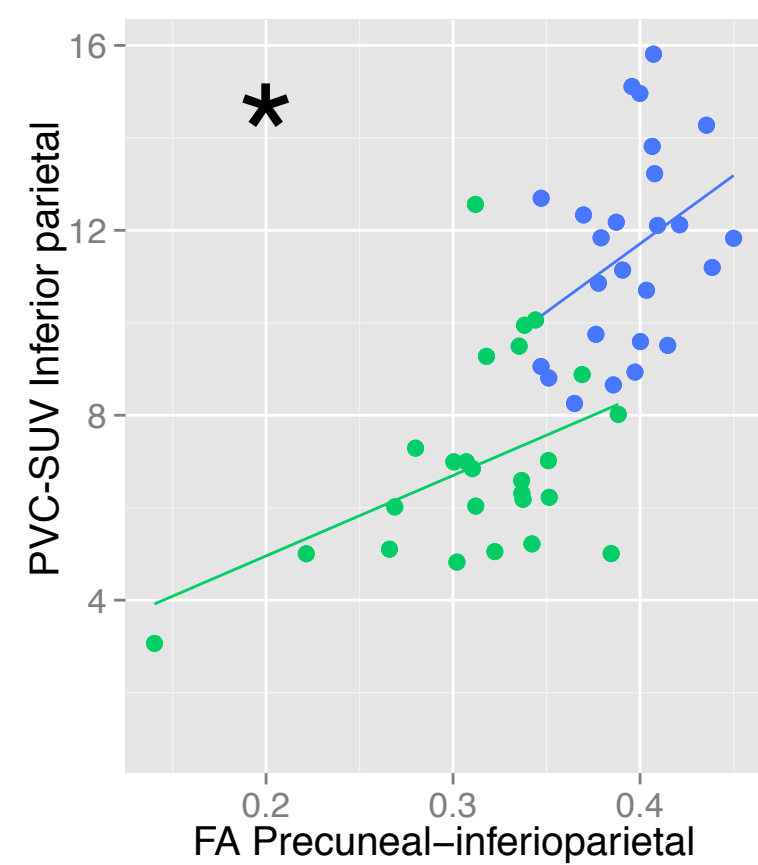

Supplement: HBM-37-3707-s004.pdf [file HBM-37-3707-s004.pdf]

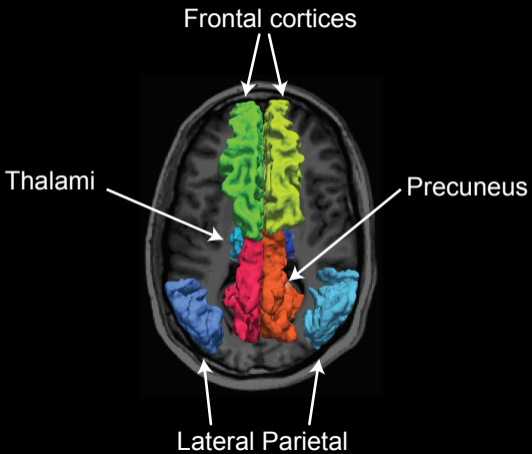

## Default mode fibers

Healthy control

Brain injured patient

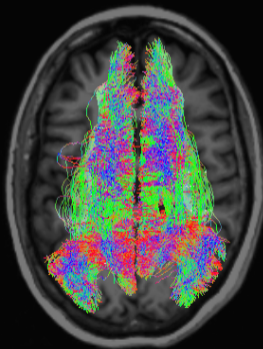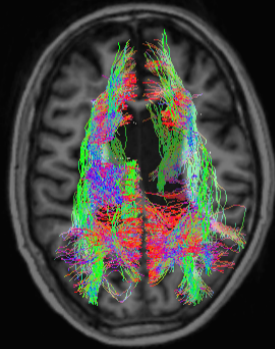

Supplement: HBM-37-3707-s005.pdf [file HBM-37-3707-s005.pdf]
